# Supplementary material for: Monitoring gelation using magnetic nanoparticles
Source: Royal Society of Chemistry journal article supplement (doi:10.1039/c003284k), 2010-01-01
Supplement: c003284k.pdf [file c003284k.pdf]

## Supplementary Information

### Monitoring nanoscale gelation using magnetic nanoparticles

Carola Barrera, Vivian Florián-Algarin, Aldo Acevedo, and Carlos Rinaldi\*

*Department of Chemical Engineering, University of Puerto Rico-Mayagüez Campus,  
PO Box 9000, Mayagüez, PR 00681*

### Electronic Supplementary Information

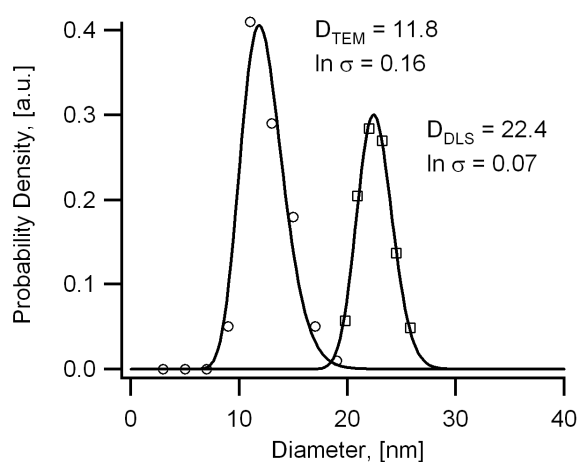

**Figure SI-1:** Diameter distributions obtained from TEM (left) and dynamic light scattering (right) for PEG coated CoFe<sub>2</sub>O<sub>4</sub> nanoparticles.

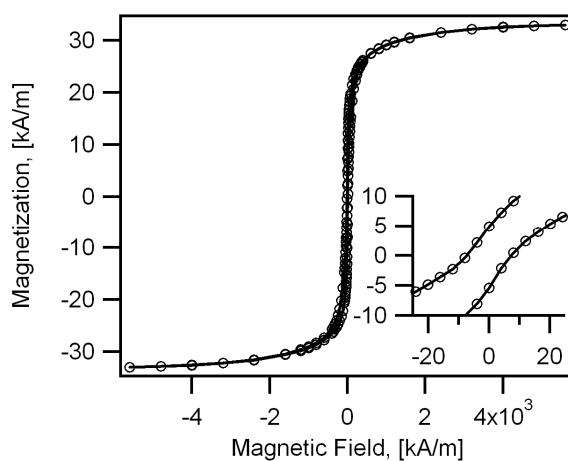

**Figure SI-2:** Equilibrium magnetization for CoFe<sub>2</sub>O<sub>4</sub> nanoparticles coated with OA and fixed in paraffin at 27°C. There is a slight hysteresis (inset) with a coercivity of 7.5 kA/m.

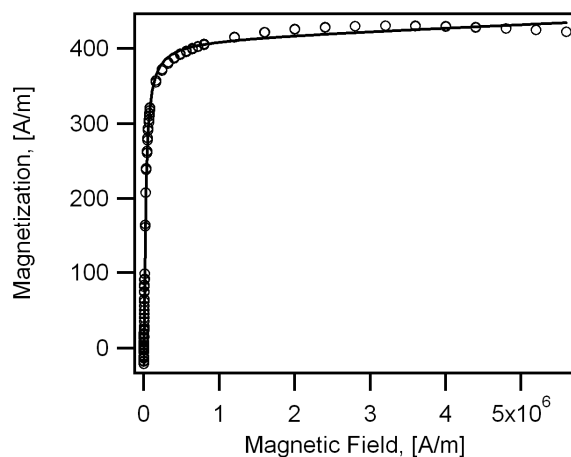

**Figure SI-3:** Equilibrium magnetization for CoFe<sub>2</sub>O<sub>4</sub> nanoparticles coated with OA and suspended in hexane at 27°C.

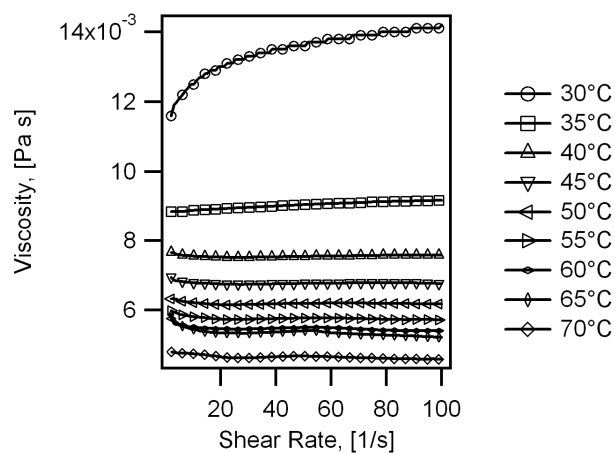

**Figure SI-4:** Shear rate dependence of viscosity for various temperatures. The solution appears Newtonian at 35°C and above and slightly shear thickening at 30°C.
